# Supplementary material for: Coronavirus Disease 2019 and Stroke: Clinical Manifestations and Pathophysiological Insights in a Brazilian Stroke Center
Source: Research Square preprint supplement (doi:10.21203/rs.3.rs-4745971/v1), 2024-08-09
Supplement: Supplementary file 1 [file 3e193c5e8463bd2a1a7f4b43.pdf]

The manuscript does not contain data from any individual person (approved by the ethics committee without the need for prior individual consent) and there was no

Funding.

yours sincerely,

Francisco Tomaz Meneses de Oliveira
